# Supplementary material for: Estrous Cycle and Egg Release Resets with Light Entrainment Inspired by Neurodynamics in the Circadian Pacemaker
Source: Research Square preprint supplement (doi:10.21203/rs.3.rs-2069847/v1), 2022-10-03
Supplement: Supplementary file 1 [file 3bd1d35467647519fef5ecba.docx]

| sgRNA | crRNA sequence | Forward primer | Reverse primer |
| --- | --- | --- | --- |
| Vipr2-B | GGGCATCCGAATGACCCACC | TTGACTCACCCAGGAAAGCC | TTGGAAATGGGCAGCAGACT |
| Kiss1r-B | AGCGTTGGACGGAGCCCACC | CAGAGGAGCCTCTTTCCAGC | TTCCTGACTTGGACCCCAGA |

Table S2: related to figure 2. crRNA sequences and associated primers for Genetic knockout in GnRH neurons using CRISPR
