# Supplementary material for: Estrous Cycle and Egg Release Resets with Light Entrainment Inspired by Neurodynamics in the Circadian Pacemaker
Source: Research Square preprint supplement (doi:10.21203/rs.3.rs-2069847/v1), 2022-10-03
Supplement: Supplementary file 2 [file 53d11307f9ba2f090b463a94.docx]

| **REAGENT or RESOURCE** | SOURCE | IDENTIFIER |
| --- | --- | --- |
| **Antibodies** | | |
| GFP (Chicken) | Aves | GFP-1020,  RRID [AB_1608076](http://antibodyregistry.org/AB_1608076) |
| GFP (Goat) | abcam | ab6673  RRID [AB_305643](http://antibodyregistry.org/AB_305643) |
| VIP (Rb) | Immunostar | 20077  RRID [AB_572270](http://antibodyregistry.org/AB_572270) |
| c-Fos (Rb) | abcam | ab209794  RRID AB_2905616 |
| VPAC2 (Rb) | Antibodies.com | A96020 (G790)  RRID AB_10695996 |
| KISS1R (Rb) | Proteintech | 15505-1-AP  RRID [AB_10640578](http://antibodyregistry.org/AB_10640578) |
| GnRH (GP) | Greg Anderson, Otago University | GA-04 |
| Alexa Fluor 488 AffiniPure F(ab')2 Fragment Donkey Anti-Chicken IgY (IgG) (H+L) | Jackson Immune | 703-546-155  RRID [AB_2340376](http://antibodyregistry.org/AB_2340376) |
| Alexa Fluor® 647 AffiniPure Fab Fragment Donkey Anti-Rabbit IgG (H+L) | Jackson Immune | 711-607-003  RRID [AB_2340626](http://antibodyregistry.org/AB_2340626) |
| Cy™3 AffiniPure Donkey Anti-Guinea Pig IgG (H+L) | Jackson Immune | 706-165-148  RRID [AB_2340460](http://antibodyregistry.org/AB_2340460) |
| Donkey Anti-Goat IgG H&L (Alexa Fluor® 488) | abcam | ab150129  RRID [AB_2687506](http://antibodyregistry.org/AB_2687506) |
| **Bacterial and virus strains** | | |
| AAV5.hSyn.DIO.hM3D(Gq).mcherry | Addgene | 44361-AAV5 |
| AAV5.Flex.taCasp3.TEVp | UNC Vector Core | #45580 |
| AAV5.Ef1a.DIO.eYFP.WPRE.hGH | Addgene | 27056-AAV5 |
| AAVrt.CAG.FLEX.tdTomato.WPRE | Addgene | 51503-AAVrg |
| AAVrt.CAG.sgVipr2(A) | Glab |  |
| AAVrt.CAG.sgVipr2(B) | Glab |  |
| AAVrt.CAG.sgKiss1r | Glab |  |
| **Chemicals, peptides, and recombinant proteins** | | |
| Normal Donkey Serum | Jackson Immune | 017-000-121 |
| Dimethyl sulfoxide | Fisher | D128-4 |
| Heparin | Sigma-aldrich | H3393-100KU |
| Triton X 100 | Sigma-aldrich | 93443-100ML |
| TWEEN 20 | Sigma-aldrich | 3005 |
| Glycine | Sigma-aldrich | G7126-100G |
| D-Fructose | Sigma-aldrich | F0127-1KG |
| -Thioglycerol | Sigma-aldrich | M1753-100ML |
| Clozapine N-oxide (CNO) dihydrochloride | Tocris | 6329/10 |
| **Recombinant DNA and virus perpetration components** | | |
| pSpCas9(BB)-2A-GFP, Feng Zhang | Addgene | 48138 |
| AAV2-retro, Alla Karpova and David Schaffer | Addgene | 81070 |
| Neuro-2a cells | ATCC | CCL-131 |
| HEK293T cells | ATCC | CRL 3216 |
| QuickExtract DNA Extraction Solution | Lucigen | QE09050 |
| NEBuilder HiFi | New England Biolabs | E2621 |
| polyethylenimine | Polysciences | 24765-1 |
| Iodixanol, Optiprep | Sigma-Millipore | D1556 |
| **Software and algorithms** | | |
| ICE analysis | Synthego |  |
| ImageJ, version 2.0.0-rc-69/1.52n | NIH, open source | <https://fiji.sc/> |
| Adobe Illustrator, 24.0.2 (64-bit) | Adobe | <https://www.adobe.com/products/illustrator.html> |
| Matlab R2020b, R2018a | MathWorks Inc. | https://www.mathworks.com/products/matlab.html |
| Imaris 9.2.0 | Oxford Instruments | <https://imaris.oxinst.com/> |
| Zen (LSM 880, 2.3 lite) | Zeiss Microscopy | https://www.zeiss.com |
| BioRender | BioRender | https://biorender.com/ |
| Custom code to analyze and generate figures | This paper | [GradinaruLab/SCN-VIP-estrous-cycle: Anat Kahan, Aug 2022 (github.com)](https://github.com/GradinaruLab/SCN-VIP-estrous-cycle) |
| **Other** | | |
| Optical fiber, 400 μm diameter, 7 mm long | Doric Lenses | MFC_400/430-0.48_7mm_ZF1.25_FLT |
| Mono Fiberoptic Patch cable (fiber photometry) | Doric Lenses | MFC_400/430_0.48_2m_FC_ZF1.25_FL |
| Double patch cable (optogenetics) | Doric Lenses | BFP(2)_400/430/1100_0.48_1.5m_FCM*-2xZF1.25(F) |

Table S1: Detailed reagent and resources.
